# Supplementary material
Source: PubMed Central journal article supplement (PMC8568019)
Supplement: NIHMS1744070-supplement-table_1.pdf [file NIHMS1744070-supplement-table_1.pdf]

# Supplementary Material

## Systolic Blood Pressure and Cognition in the Elderly: The Northern Manhattan Study

**Supplementary Table 1.** Characteristics of the NOMAS Cognition/MRI-Sub-study Sample at a 5-year follow-up (N=830)

|                           | <b>Follow-up samples<br/>(n=830)</b> | <b>Missing samples<br/>(n=385)</b> | <b>p</b> |
|---------------------------|--------------------------------------|------------------------------------|----------|
| <b>Age (y)</b>            | 69 ± 8                               | 74 ± 9                             | ***      |
| <b>Education (y)</b>      | 10 ± 5                               | 9 ± 5                              | **       |
| <b>Male (%)</b>           | 38                                   | 42                                 | n.s.     |
| <b>White (%)</b>          | 13                                   | 19                                 | **       |
| <b>Hispanic (%)</b>       | 68                                   | 61                                 | **       |
| <b>Black (%)</b>          | 16                                   | 18                                 | n.s.     |
| <b>Other (%)</b>          | 2.4                                  | 2.1                                | n.s.     |
| <b>Hypertension (%)</b>   | 71                                   | 76                                 | n.s.     |
| <b>SBP (mm Hg)</b>        | 136 ± 18                             | 138 ± 17                           | n.s.     |
| <b>DBP (mm Hg)</b>        | 79 ± 9                               | 77 ± 10                            | ***      |
| <b>Diabetes (%)</b>       | 22                                   | 24                                 | n.s.     |
| <b>Hyperlipidemia (%)</b> | 39                                   | 40                                 | n.s.     |
| <b>APOE 4 (%)</b>         | 25                                   | 25                                 | n.s.     |
| <b>BMI (mean±SD)</b>      | 29 ± 5                               | 28 ± 5                             | **       |

SBP, systolic blood pressure; DBP, diastolic blood pressure; PP, pulse pressure; BMI, body mass index; \*p ≤ 0.05; \*\*p ≤ 0.01; \*\*\*p ≤ 0.001.
